# Supplementary material
Source: publisher figshare collection journal article supplement (https://acs.figshare.com/ndownloader/files/21808185)
Supplement: Supplementary file 2 [file 21808185]

# **Supplementary Information: The Metabolic Rainbow: Deep Learning Phase I Metabolism in Five Colors**

Na Le Dang, Matthew K. Matlock, Tyler B. Hughes, and S. Joshua Swamidass\*

*Department of Pathology and Immunology, Washington University School of Medicine,  
Campus Box 8118, 660 S. Euclid Ave., St. Louis, Missouri 63110, United States*

E-mail: [swamidass@gmail.com](mailto:swamidass@gmail.com)

Phone: 314.935.3567

## **Contents**

|                                                                        |            |
|------------------------------------------------------------------------|------------|
| <b>Training Data Set</b>                                               | <b>S2</b>  |
| <b>Descriptors</b>                                                     | <b>S2</b>  |
| <b>Comparison between “Color Bond” and Generic Metabolism Labeling</b> | <b>S4</b>  |
| <b>Identification of Potential Sites of Metabolism</b>                 | <b>S5</b>  |
| <b>Probabilistic Output at Site- and Molecule-Levels</b>               | <b>S6</b>  |
| <b>Model Selection</b>                                                 | <b>S10</b> |

# Training Data Set

The list of unique molecules IDs, associated molecule and reaction registry numbers, and their metabolic status is provided in "AMD\_Registry\_Numbers.csv" file. This is a comma-separated values text file with the "UniqueDatasetMoleculeID" column containing the assigned ID in the training data set. The "MOLREGNO" and "RXNREGNO" columns provide Accelrys Metabolite Database registry number. Columns "Stable Oxygenation", "Unstable Oxygenation", "Dehydrogenation", "Hydrolysis" and "Reduction" indicate whether the molecule is metabolized by the enzymatic entity.

## Descriptors

The following tables detail all the descriptors used by the model in this study.

**Table S1:** Atom-derived bond-level descriptors used by the XenoSite Human Phase I Metabolism Model.

|                                    |                                                                                                                                   |
|------------------------------------|-----------------------------------------------------------------------------------------------------------------------------------|
| Ne_d                               | number of atoms depth $d$ (0, 1, 2, 3, 4) bonds away of type element $e$ (C, O, N, S, P, F, Cl, Br or I)                          |
| Pe_d                               | percentage of atoms depth $d$ (1, 2, 3, 4) bonds away of type element $e$ (C, O, N, S, P, F, Cl, Br or I)                         |
| Ne_sp <sub><math>i</math></sub> _d | number of atoms depth $d$ (0, 1, 2, 3) bonds aways of type element $e$ (C,O,N,S)with sp <sub><math>i</math></sub> hybridization   |
| sp <sub><math>i</math></sub> _d    | number of sp <sub><math>i</math></sub> hybridization depth $d$ (0, 1, 2, 3) bonds aways                                           |
| TotalBondOrder                     | total bond order                                                                                                                  |
| Span                               | (maximum path length from current atom)/(maximum path length from all atoms within the molecule)                                  |
| InvertedSpan                       | 1/(1 + Span)                                                                                                                      |
| Normalized Span                    | Span/(maximum span within molecule)                                                                                               |
| Ring <sub><math>n</math></sub>     | within ring of size $n$ (3, 4, 5, 6, 7, 8 )                                                                                       |
| NRings                             | total number of rings containing atom                                                                                             |
| MaxInvRingSize                     | size of the largest ring containing the atom                                                                                      |
| SRing                              | smallest ring containing atom                                                                                                     |
| HBonded                            | total number of hydrogens bonded to atom                                                                                          |
| NANbrs                             | total number of atoms bonded to atom                                                                                              |
| RB                                 | number of rotatable bonds for atom                                                                                                |
| PT_ElectronNeg                     | electron negativity                                                                                                               |
| PT_ElectronAffinity                | electron affinity                                                                                                                 |
| PT_Ionization                      | ionization state                                                                                                                  |
| PT_BondRad                         | Bond radius                                                                                                                       |
| PT_VdwRad                          | Vdw radius                                                                                                                        |
| Aromatic                           | binary value indicating whether atom is aromatic                                                                                  |
| SP <sup>1</sup>                    | binary value indicating whether atom is sp <sup>1</sup> hybridized                                                                |
| SP <sup>2</sup>                    | binary value indicating whether atom is sp <sup>2</sup> hybridized                                                                |
| SP <sup>3</sup>                    | binary value indicating whether atom is sp <sup>3</sup> hybridized                                                                |
| HybX                               | binary value indicating whether atom is non-sp hybridized                                                                         |
| Lone_Pair_Depth_d                  | Number of lone pair depth $d$ (0,1,2,3) bonds away                                                                                |
| AromaticNeighbors                  | Number of aromatic neighbors                                                                                                      |
| BN_t_d                             | number of type $t$ (single, double, triple, aromatic) bond neighbors of depth $d$ away                                            |
| Within_substructure                | whether the atom is in a <i>substructure</i> ( $\alpha$ - $\beta$ unsaturated ketone, carboxyl, sulfate, phosphate, nitro, amide) |

**Table S2:** Bond-level descriptors used by the XenoSite Human Phase I Metabolism Model.

| Name                   | Descriptions                                                     |
|------------------------|------------------------------------------------------------------|
| Single                 | whether the bond is a single bond                                |
| Double                 | whether the bond is a double bond                                |
| Triple                 | whether the bond is a triple bond                                |
| Aromatic               | whether the bond is an aromatic bond                             |
| In Ring                | whether the bond is part of a ring                               |
| Connected to Hydrogen  | whether the bond is between a heavy atom and a hydrogen          |
| Lone Pair              | whether this is a lone pair (not a bond)                         |
| Ester                  | whether the bond is an ester bond                                |
| Amide                  | whether the bond is an amide bond                                |
| NTopologicalEquivalent | number of topological equivalent of the bond within the molecule |

**Table S3:** Molecule-level descriptors used by the XenoSite Human Phase I Metabolism Model.

| Name             | Descriptions                                            |
|------------------|---------------------------------------------------------|
| atoms            | number of atoms                                         |
| bonds            | number of bonds                                         |
| TPSA             | topological polar surface area                          |
| logP             | octanol/water partition coefficient                     |
| HBD              | number of hydrogen bond donors                          |
| HBA <sub>1</sub> | number of hydrogen bond acceptors Pybel SMARTS string 1 |
| HBA <sub>2</sub> | number of hydrogen bond acceptors Pybel SMARTS string 2 |
| MR               | molar refractivity                                      |
| MW               | molecular weight                                        |
| sbonds           | number of single bonds                                  |
| dbonds           | number of double bonds                                  |
| tbonds           | number of triple bonds                                  |
| abonds           | number of aromatic bonds                                |
| heavy atoms      | number of heavy atoms                                   |
| hydrogens        | number of hydrogens                                     |
| NumRings         | number of rings                                         |

**Table S4:** Descriptor groups used for sensitivity analysis.

| Atom Element                 | Ne <sub>d</sub> with $d = 0$                                   |
|------------------------------|----------------------------------------------------------------|
| Atoms One Bond Away          | N <sub>d_e</sub> and P <sub>d_e</sub> with $d = 1$             |
| Atoms Two Bonds Away         | N <sub>d_e</sub> and P <sub>d_e</sub> with $d = 2$             |
| Atoms Three Bonds Away       | N <sub>d_e</sub> and P <sub>d_e</sub> with $d = 3$             |
| Atoms Four Bonds Away        | N <sub>d_e</sub> and P <sub>d_e</sub> with $d = 4$             |
| Size of Ring Containing Atom | Ring <sub>n</sub> , NRings, and SRing                          |
| Hybridization State          | SP <sup>1</sup> , SP <sup>2</sup> , SP <sup>3</sup> , and HybX |

# Comparison between “Color Bond” and Generic Metabolism Labeling

Differences between our “Color Bond” and Generic Metabolism Labeling schemes are shown in Table S5.

**Table S5: “Colored Bond” and Generic Site of Metabolism Labeling Schemes**

| Color  | Reaction Type                   | Labeled Site of Metabolism                                            |                                                  |
|--------|---------------------------------|-----------------------------------------------------------------------|--------------------------------------------------|
|        |                                 | “Colored Bond”                                                        | Generic                                          |
| Red    | Epoxidation                     | the double/ aromatic bond between two heavy atoms                     | the two heavy atoms                              |
|        | Hydroxylation                   | the bond between a heavy atom and a hydrogen                          | the heavy atom                                   |
|        | S-oxidation                     | the lone pair on a sulfur atom                                        | the sulfur atom                                  |
|        | N-oxidation                     | the lone pair on an nitrogen atom                                     | the nitrogen atom                                |
| Orange | N-dealkylation                  | the bond between a nitrogen and a carbon                              | the carbon atom                                  |
|        | O-dealkylation                  | the bond between an oxygen and a carbon                               | the carbon atom                                  |
|        | S-dealkylation                  | the bond between a sulfur and a carbon                                | The carbon atom                                  |
|        | C-dealkylation                  | the bond between two carbons                                          | the carbon atom that the oxygen attaches to      |
|        | P-dealkylation                  | the bond between a phosphorus and a carbon atom                       | the carbon atom                                  |
|        | Oxidative Dehalogenation        | the bond between a halogen and a carbon                               | the carbon atom                                  |
| DH     | Double/triple bond formation    | the bond between the abstracted hydrogen and its connected heavy atom | the heavy atom                                   |
|        | Quinone/Imine/Methide formation | the bond between heavy atom and hydrogen                              | the heavy atom                                   |
| RD     | Nitro reduction                 | the bond between nitrogen and attached oxygen                         | the nitrogen atom                                |
|        | Carbonyl reduction              | the carbonyl bond                                                     | the carbon atom                                  |
|        | Sulfo reduction                 | the bond between sulfur and attached oxygen                           | the sulfur atom                                  |
|        | Reductive dehalogenation        | the bond between halogen and attached carbon                          | the carbon atom                                  |
|        | Hydrogenation                   | the double, triple bond between pair of hydrogenated atoms            | the heavy atom                                   |
| HD     | Amide hydrolysis                | amide bond                                                            | the heavy atoms on either sides of bond breakage |
|        | Ester hydrolysis                | ester bond                                                            | the heavy atoms on either sides of bond breakage |
|        | Ether hydrolysis                | ether bond                                                            | the heavy atoms on either sides of bond breakage |

# Identification of Potential Sites of Metabolism

Reaction type-specific potential sites are defined using SMARTS patterns (Table S6).

**Table S6: SMARTS Strings used to Identify Reaction Type-Specific Potential Sites**

| Reaction Type                   | SMARTS                                                                                                                                                                                                                                                                                                                                                                                                                          |
|---------------------------------|---------------------------------------------------------------------------------------------------------------------------------------------------------------------------------------------------------------------------------------------------------------------------------------------------------------------------------------------------------------------------------------------------------------------------------|
| epoxidation                     | <chem>\$([#6,#7,#16,#15]=[#6,#7,#16,#15]), \$([c,n,s,p][c,n,s,p])</chem>                                                                                                                                                                                                                                                                                                                                                        |
| hydroxylation                   | <chem>\$([#6;H1,H2,H3])</chem>                                                                                                                                                                                                                                                                                                                                                                                                  |
| S-oxidation                     | <chem>!\$([#16X4](=[OX1])(=[OX1])([OX2H,OX1H0-])[OX2][#6]);</chem><br><chem>!\$([#16X4+2]([OX1-])([OX1-])([OX2H,OX1H0-])[OX2][#6]);</chem><br><chem>\$([#16])</chem>                                                                                                                                                                                                                                                            |
| N-oxidation                     | <chem>!\$([NX3](=O)=O);!\$([NX3+](=O)[O-]);\$([#7])</chem>                                                                                                                                                                                                                                                                                                                                                                      |
| N-dealkylation                  | <chem>[#7][#6]</chem>                                                                                                                                                                                                                                                                                                                                                                                                           |
| O-dealkylation                  | <chem>[#8][#6]</chem>                                                                                                                                                                                                                                                                                                                                                                                                           |
| S-dealkylation                  | <chem>[#16][#6]</chem>                                                                                                                                                                                                                                                                                                                                                                                                          |
| C-dealkylation                  | <chem>[#6][#6]</chem>                                                                                                                                                                                                                                                                                                                                                                                                           |
| oxidative dehalogenation        | <chem>[#9,#17,#35,#53][#6]</chem>                                                                                                                                                                                                                                                                                                                                                                                               |
| double-, triple- bond formation | <chem>\$([#6;H1,H2,H3]), \$([#7;H1,H2,H3]), \$([#8;H1]), \$([#16;H1])</chem>                                                                                                                                                                                                                                                                                                                                                    |
| quinone formation               | <chem>\$([#8H]cccc[#8H]), \$([#8H]cc[#8H])</chem>                                                                                                                                                                                                                                                                                                                                                                               |
| imine formation                 | <chem>\$([#7H]cccc[#7H]), \$([#7H]cc[#7H])</chem>                                                                                                                                                                                                                                                                                                                                                                               |
| quinone imine formation         | <chem>\$([#7H]cccc[#8H]), \$([#7H]cc[#8H]), \$([#8H]cccc[#7H]),</chem><br><chem>\$([#8H]cc[#7H])</chem>                                                                                                                                                                                                                                                                                                                         |
| quinone methide formation       | <chem>\$([#6H]cccc[#8H]), \$([#6H]cc[#8H]), \$([#8H]cccc[#6H]),</chem><br><chem>\$([#8H]cc[#6H])</chem>                                                                                                                                                                                                                                                                                                                         |
| imine methide formation         | <chem>\$([#7H]cccc[#6H]), \$([#7H]cc[#6H]), \$([#6H]cccc[#7H]),</chem><br><chem>\$([#6H]cc[#7H])</chem>                                                                                                                                                                                                                                                                                                                         |
| nitro reduction                 | <chem>\$([NX3](=O)=O), \$([NX3+](=O)[O-]), \$([#7][O]), \$([#7+][O-])</chem>                                                                                                                                                                                                                                                                                                                                                    |
| carbonyl reduction              | <chem>\$([#6X3]=[OX1]), \$([#6X3+][OX1-])</chem>                                                                                                                                                                                                                                                                                                                                                                                |
| sulfo reduction                 | <chem>\$([#16]O)</chem>                                                                                                                                                                                                                                                                                                                                                                                                         |
| reductive dehalogenation        | <chem>[#9,#17,#35,#53][#6]</chem>                                                                                                                                                                                                                                                                                                                                                                                               |
| hydrogenation                   | <chem>[#6,#7,#8];#[#6,#7,#8]</chem>                                                                                                                                                                                                                                                                                                                                                                                             |
| amide hydrolysis                | <chem>\$([#7][CX3,P,S](=[OX1])), \$([CX3,P,S](=[OX1])[#7])</chem><br><chem>\$([#8X2H0,#16X2H0]([#6,#7,#15])[C,P,S,N](=[#8X1,S])),</chem><br><chem>\$([C,P,S,N](=[#8X1,#16])[#8X2H0,#16X2H0][#6,#7,#15]),</chem><br><chem>\$([OX2H0,SX2H0]([#6,#7])P1S01),</chem><br><chem>\$([P1(S01)[OX2H0,SX2H0][#6,#7]),</chem><br><chem>\$([#9,#17,#35,#53][CX3,P,S](=[OX1])),</chem><br><chem>\$([CX3,P,S](=[OX1])[#9,#17,#35,#53])</chem> |
| ester hydrolysis                | <chem>\$([OD2]([#6])[#6]);!\$([OX2H0]([#6])[CX3](=O))</chem>                                                                                                                                                                                                                                                                                                                                                                    |

## Probabilistic Output at Site- and Molecule-Levels

The model output can be interpreted as probabilities. When we binned class-specific sites by the Phase I prediction score, the proportion of class-specific SOMs in each bin closely correlated with the bin's score (Figure S1). Likewise, when we binned molecules by the Phase I molecule score, the proportion of class-specific metabolized molecules in each bin also correlates with the bin score (Figure S2). Quantitatively, Pearson regression coefficients of site and molecule levels are 0.996 and 0.947, respectively.

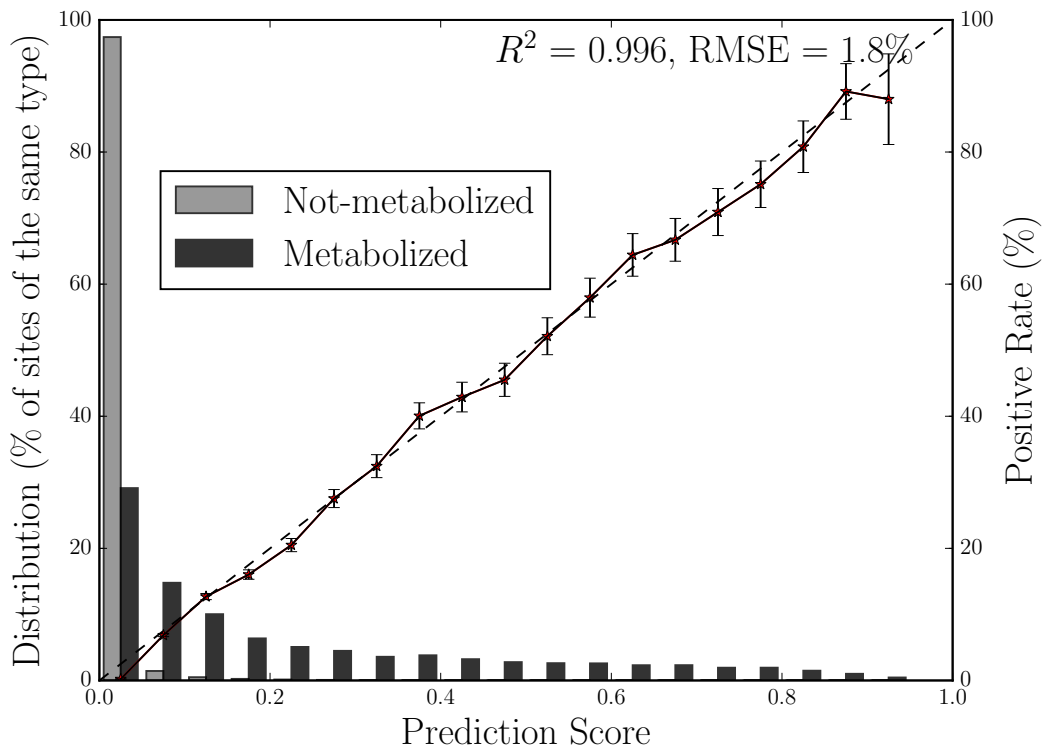

**Figure S1: The model makes well-scaled predictions, corresponding to probabilities.** The bar graphs plot the distributions of scores across class-specific 691349 metabolized and non-metabolized bonds and lone pair. The solid lines plot the percentage of bonds and lone pairs that are metabolized via a specific Phase I reaction class (using non-normalized frequencies) in each bin. The diagonal dashed lines indicate a hypothetical perfectly scaled prediction. Rainbow XenoSite score has a strong correlation to a perfectly scaled prediction ( $R^2$  value of 0.996 and RMSE of 1.8%). This means that the score is interpretable as the probability that a bond or lone-pair is metabolized via a the corresponding Phase I reaction class.

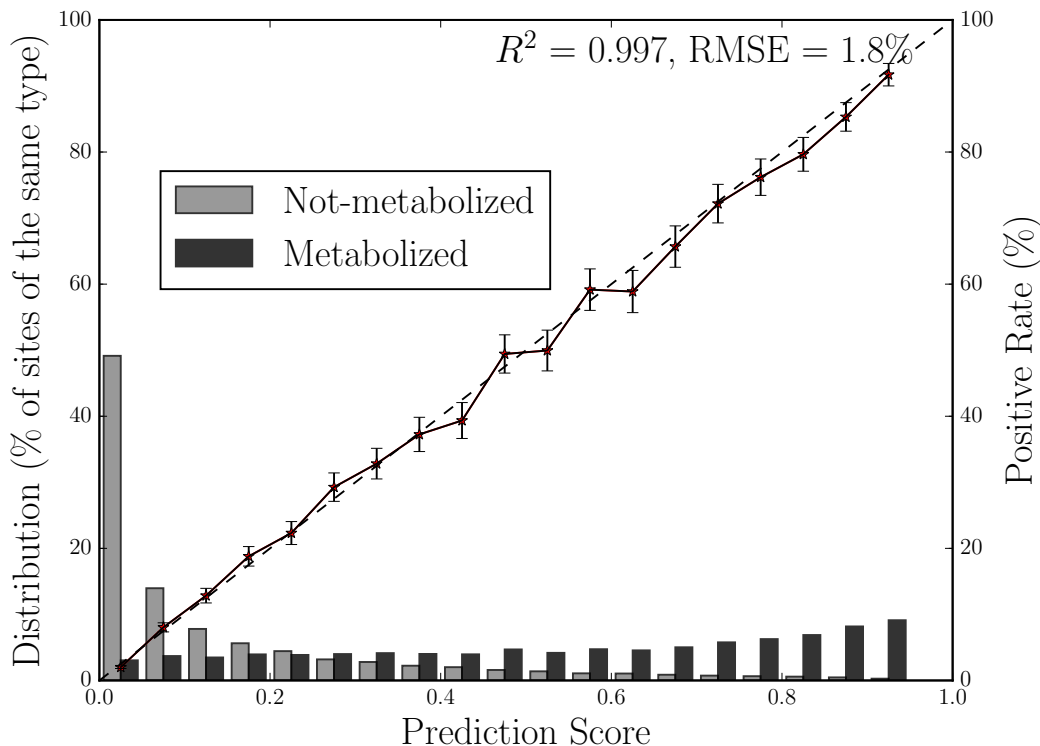

**Figure S2: The model makes well-scaled predictions, corresponding to probabilities.** The bar graphs plot the distributions of scores across 9674 class-specific metabolized and non-metabolized molecules. The solid lines plot the percentage of bonds and lone pairs that are metabolized via a specific Phase I reaction class (using non-normalized frequencies) in each bin. The diagonal dashed lines indicate a hypothetical perfectly scaled prediction. Rainbow XenoSite score has a strong correlation to a perfectly scaled prediction ( $R^2$  value of 0.997 and RMSE of 1.8%). This means that a class-specific molecule score is interpretable as the probability that molecule is metabolized via the corresponding Phase I reaction class.



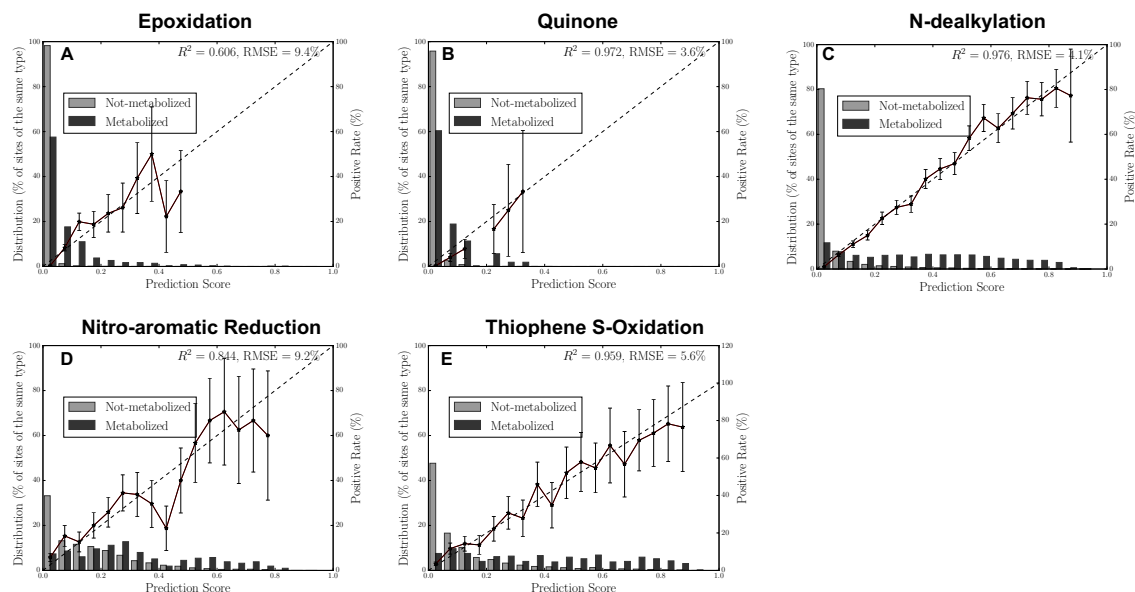

**Figure S3: The model makes well-scaled predictions, corresponding to probabilities, for five key reactive metabolite formation reactions: epoxidation (A), one-step quinone formation (B), N-dealkylation (C), nitroaromatic reduction (D), and thiophene S-oxidation (E).** The bar graphs plot the distributions of scores across metabolized and non-metabolized potential sites for each reaction type. The solid lines plot the percentage of bonds and lone pairs that are metabolized via the corresponding reaction (using non-normalized frequencies) in each bin. The diagonal dashed lines indicate a hypothetical perfectly scaled prediction. Rainbow XenoSite score has a strong correlation to a perfectly scaled prediction. This means that the score is interpretable as the probability that potential sites is metabolized via the corresponding bioactivation reaction.

# Molecule Level Model Selection

Following site-level training, we investigated several methods of discriminating between type-specific metabolized and non-metabolized molecules (Table S7). Each of the tested model takes as input the top N site-prediction scores for each reaction class and molecule-level descriptors and outputs five prediction scores for each molecule. The number of molecule hidden layers (MHL) and L2 regularization coefficient ( $\lambda$ ) also vary (Table S7). The best performing model (model 35 in Table S7) was a neural network that takes as input the top five site-prediction scores for each reaction class (25 descriptors in total), two hidden layers, each with 5 hidden nodes, and an L2 regularization of 0.3. This model was chosen as our final model.

**Table S7:** Parameter Sweep Class Targets (5) Model Structure.

| ID | TopN | MHL | $\lambda$ | SO       | UO       | DH       | RD       | HD       |
|----|------|-----|-----------|----------|----------|----------|----------|----------|
| 0  | 3    | 4   | 1.0       | 0.764775 | 0.821044 | 0.727566 | 0.879582 | 0.918844 |
| 1  | 3    | 4   | 0.3       | 0.771873 | 0.827215 | 0.704956 | 0.884103 | 0.921337 |
| 2  | 3    | 4   | 0.1       | 0.775550 | 0.831167 | 0.676844 | 0.882129 | 0.919762 |
| 3  | 3    | 3   | 1.0       | 0.773287 | 0.827940 | 0.752701 | 0.877028 | 0.922459 |
| 4  | 3    | 3   | 0.1       | 0.772452 | 0.830162 | 0.702973 | 0.887219 | 0.920524 |
| 5  | 5    | 4   | 0.3       | 0.776244 | 0.833654 | 0.739328 | 0.888282 | 0.922951 |
| 6  | 4    | 4   | 1.0       | 0.776654 | 0.830816 | 0.709263 | 0.882751 | 0.919626 |
| 7  | 5    | 4   | 0.1       | 0.780520 | 0.833027 | 0.767344 | 0.892992 | 0.923390 |
| 8  | 3    | 3   | 0.3       | 0.774295 | 0.834450 | 0.732586 | 0.886827 | 0.923245 |
| 9  | 4    | 4   | 0.3       | 0.782232 | 0.832007 | 0.742844 | 0.883918 | 0.925234 |
| 10 | 3    | 2   | 0.1       | 0.776196 | 0.835362 | 0.735300 | 0.886593 | 0.927163 |
| 11 | 6    | 4   | 1.0       | 0.778282 | 0.835395 | 0.749546 | 0.891311 | 0.923514 |
| 12 | 6    | 4   | 0.3       | 0.782201 | 0.834775 | 0.717160 | 0.894165 | 0.923016 |
| 13 | 4    | 3   | 1.0       | 0.775083 | 0.832192 | 0.739706 | 0.892056 | 0.921543 |
| 14 | 4    | 3   | 0.1       | 0.773861 | 0.834953 | 0.767055 | 0.894574 | 0.923560 |
| 15 | 4    | 4   | 0.1       | 0.772906 | 0.832040 | 0.759228 | 0.889462 | 0.922763 |
| 16 | 5    | 3   | 0.1       | 0.780201 | 0.836226 | 0.754724 | 0.900464 | 0.923731 |
| 17 | 3    | 2   | 0.3       | 0.775407 | 0.836006 | 0.740295 | 0.896264 | 0.922981 |
| 18 | 4    | 3   | 0.3       | 0.778681 | 0.835636 | 0.748597 | 0.894405 | 0.926030 |
| 19 | 3    | 2   | 1.0       | 0.772494 | 0.837126 | 0.735795 | 0.893673 | 0.925630 |
| 20 | 5    | 4   | 1.0       | 0.777216 | 0.835348 | 0.764207 | 0.895315 | 0.922364 |
| 21 | 5    | 2   | 0.1       | 0.777104 | 0.837707 | 0.749111 | 0.899152 | 0.928100 |
| 22 | 4    | 2   | 1.0       | 0.781098 | 0.836724 | 0.765054 | 0.900211 | 0.928151 |
| 23 | 6    | 4   | 0.1       | 0.778552 | 0.836661 | 0.757454 | 0.897818 | 0.927834 |
| 24 | 5    | 3   | 0.3       | 0.778268 | 0.837809 | 0.751910 | 0.900016 | 0.926298 |
| 25 | 6    | 3   | 0.3       | 0.784404 | 0.839816 | 0.720174 | 0.899714 | 0.927802 |
| 26 | 5    | 2   | 1.0       | 0.780069 | 0.835808 | 0.771889 | 0.899297 | 0.925255 |
| 27 | 6    | 3   | 0.1       | 0.781495 | 0.837520 | 0.775721 | 0.894807 | 0.925889 |
| 28 | 5    | 3   | 1.0       | 0.786632 | 0.840975 | 0.770587 | 0.896965 | 0.927352 |
| 29 | 4    | 2   | 0.1       | 0.779813 | 0.838217 | 0.773614 | 0.902970 | 0.923578 |
| 30 | 6    | 3   | 1.0       | 0.781348 | 0.836329 | 0.750546 | 0.900233 | 0.926382 |
| 31 | 6    | 2   | 0.3       | 0.778025 | 0.838190 | 0.747801 | 0.904363 | 0.928374 |
| 32 | 6    | 2   | 1.0       | 0.785288 | 0.841007 | 0.771881 | 0.903085 | 0.929299 |
| 33 | 6    | 2   | 0.1       | 0.779683 | 0.842008 | 0.747395 | 0.906530 | 0.925378 |
| 34 | 4    | 2   | 0.3       | 0.783752 | 0.837626 | 0.766873 | 0.898889 | 0.925374 |
| 35 | 5    | 2   | 0.3       | 0.783742 | 0.839015 | 0.773277 | 0.903848 | 0.927057 |

Following site-level training, we investigated several methods of discriminating between type-specific metabolized and non-metabolized molecules. Each of the tested model takes as input the topN site-prediction scores for each reaction class and molecule-level descriptors and outputs five prediction scores for each molecule. The number of molecule hidden layers (MHL) and L2 regularization coefficient ( $\lambda$ ) also vary. We calculated the molecule AUCs for stable oxygenation, unstable oxygenation, dehydrogenation, reduction, and hydrolysis (SO, UO, DH, RD, and HD) for each model.
